# Supplementary material for: The companion of cellulose synthase 1 confers salt tolerance through a Tau-like mechanism in plants
Source: PubMed Central journal article supplement (PMC6382854; doi:10.1038/s41467-019-08780-3), 2019-02-20
Supplement: 41467_2019_8780_MOESM3_ESM.pdf [file 41467_2019_8780_MOESM3_ESM.pdf]

## **Description of Additional Supplementary Files**

File Name: Supplementary Movie 1

Description: CF488A-labeled His-CC1 $\Delta$ C223 proteins (green) diffuse on surfacebound microtubules (magenta) in vitro. Scale bar = 5  $\mu$ m.

File Name: Supplementary Movie 2

Description: Like GFP-CC1, GFP-CC1YAA migrates as foci at the plasma membrane. Scale bar = 5  $\mu$ m.
